# Supplementary material for: NUDT15 codon 139 is the best pharmacogenetic marker for predicting thiopurine-induced severe adverse events in Japanese patients with inflammatory bowel disease: a multicenter study
Source: PubMed Central journal article supplement (PMC6132901; doi:10.1007/s00535-018-1486-7), 2018-06-19

# Supplementary Tables & Figures

## Supplementary Figure Legends

### Supplementary Figure S1. Haplotype structures of NUDT15 and frequencies in the Japanese

Haplotypes \*1–\*6 of NUDT15 were defined from the combination of four non-synonymous variants [1]. The haplotypes containing three additional variants from a recent study [2] and two novel variants found in this study [3] were defined as \*7–\*11. All of these novel haplotypes were very rare in the Japanese population.

### Supplementary Figure S2. Manhattan plots for results of the discovery and conditional GWASs for thiopurine-induced severe leukopenia and severe alopecia

Single-nucleotide polymorphisms are plotted according to chromosomal location, with the  $-\log_{10}(P)$  from the results of GWASs. The red line indicates the threshold for the genome-wide significance ( $P = 1E^{-8}$ ). The blue line indicates the threshold for nominal significance ( $P = 1E^{-6}$ ). (A) GWAS for thiopurine-induced severe leukopenia ( $WBC < 2000/\mu L$ ), (B) conditional GWAS for severe leukopenia on rs116855232 (p.Arg139Cys), (C) GWAS for acute severe leukopenia ( $WBC < 2000/\mu L$ ,  $< 8$  weeks), (D) conditional GWAS for acute severe leukopenia on rs116855232, (E) GWAS for severe alopecia, and (F) conditional GWAS for severe alopecia on rs116855232. All significant associations disappeared in the conditional GWASs.

**Supplementary Figure S3.** Locus zoom plots of p-values around the top-hit NUDT15 region from the GWAS result with thiopurine-induced leukopenia. (A) The top associated SNP, rs116855232, is shown as purple diamonds and the remaining SNPs are shown as circles, with color indicating the level of linkage disequilibrium ( $R^2$ ) with rs116855232. (B) Plots of p-values from the conditional analysis on rs116855232. All associations disappeared.

### Supplementary Figure S4. Manhattan plots for results of the GWASs for thiopurine-induced AEs.

Single-nucleotide polymorphisms are plotted according to chromosomal location, with the  $-\log_{10}(P)$  from the results of GWASs. The red line indicates the threshold for the genome-wide significance ( $P = 1E^{-8}$ ). The blue line indicates the threshold for nominal significance ( $P = 1E^{-6}$ ). (A) GWAS for thiopurine-induced pancreatitis, (B) GWAS for infection, (C) GWAS for digestive symptoms, (D) GWAS for liver dysfunction, (E) GWAS for skin symptoms, and (F) GWAS for fever.

**Supplementary Figure S5.** (A)(B) Locus zoom plots of p-values around two candidate loci from the GWAS result with thiopurine-induced pancreatitis. The top associated SNPs in each locus are shown as purple diamonds and the remaining SNPs are shown as circles, with color indicating the level of linkage disequilibrium ( $R^2$ ) with lead SNP.

### Supplementary Figure S6. ROC curve of predictive models for thiopurine-induced AEs

ROC analyses were performed to compare the predictive logistic regression models in combination with NUDT15 codon 139 or diplotype, ABCC4 and RUNX1.

AUCs of each model to predict the AEs were evaluated. There was a significant difference between the model NUDT15\_Codon139 and NUDT15\_Haplotype in leukopenia (WBC < 3000/ $\mu$ L); there was no significant difference between the models in other severe AEs.

**Supplementary Figure S7.** Correlation between 6-MP doses and time to leukopenia in the patients with the codon 139 genotype of Cys/Cys. The log linear model was used to evaluate the correlation; significant associations were observed.

## References

1. Moriyama T, Nishii R, Perez-Andreu V, Yang W, Klussmann FA, Zhao X, et al. NUDT15 polymorphisms alter thiopurine metabolism and hematopoietic toxicity. *Nat Genet.* 2016;48(4):367-73.
2. Moriyama T, Yang YL, Nishii R, Ariffin H, Liu C, Lin TN, et al. Novel variants in NUDT15 and thiopurine intolerance in children with acute lymphoblastic leukemia from diverse ancestry. *Blood.* 2017;130(10):1209-12.
3. Nagasaki M, Yasuda J, Katsuoka F, Nariai N, Kojima K, Kawai Y, et al. Rare variant discovery by deep whole-genome sequencing of 1,070 Japanese individuals. *Nat Commun.* 2015;6:8018.

**Supplementary Table 1.** Amplification primers for direct sequencing of NUDT15 coding regions

| <b>Exons of NUDT15</b> | <b>Primers</b> |                                                   |
|------------------------|----------------|---------------------------------------------------|
| Exon 1                 | Forward        | TGTA AACGACGGCCAGTATATTCAAAGCACA ACTGTAAGCGACT    |
|                        | Reverse        | CAGGAAACAGCTATGACCCGTTCTCACGCACGGCACA             |
| Exon 2                 | Forward        | TGTA AACGACGGCCAGTGAATTAATCTAATTTTTGTTTCTGTTTTCCA |
|                        | Reverse        | CAGGAAACAGCTATGACCAGCATTCTCTTCATATGGCAACAT        |
| Exon 3                 | Forward        | TGTA AACGACGGCCAGTGTTAGCTTACCCAAATAAACACCCTTG     |
|                        | Reverse        | CAGGAAACAGCTATGACCTTCATTCCCTAACCAGACCTTATTCTTG    |

**Supplementary Table 2.** Patient characteristics and genotype frequencies of NUDT15 codon 139

|                           | <b>SASP</b> | <b>5-ASA</b> | <b>IFX</b>  | <b>ADA</b>   | <b>Thiopurines</b> | <b>Total (IBD)</b>  | <b>2KJPN</b>        |
|---------------------------|-------------|--------------|-------------|--------------|--------------------|---------------------|---------------------|
| <b>Number of subjects</b> | 322         | 2461         | 1028        | 491          | 1291               | <b>2627</b>         | <b>2036</b>         |
| <b>Disease</b>            |             |              |             |              |                    |                     |                     |
| UC                        | 218 (67.7%) | 1448 (58.8%) | 337 (32.8%) | 170 (34.6%)  | 722 (55.9%)        | <b>1519 (57.8%)</b> | -                   |
| CD                        | 101 (31.4%) | 970 (39.4%)  | 666 (64.8%) | 307 (62.5%)  | 548 (42.4%)        | <b>1048 (39.9%)</b> | -                   |
| BD                        | 3 (0.9%)    | 43 (1.7%)    | 25 (2.4%)   | 14 (2.9%)    | 21 (1.6%)          | <b>60 (2.3%)</b>    | -                   |
| <b>Age at study entry</b> |             |              |             |              |                    |                     |                     |
| Mean (range)              | 48.3 (4-89) | 40.5 (3-89)  | 38.6 (3-80) | 38.6 (10-83) | 41.0 (3-84)        | <b>40.6 (3-89)</b>  | -                   |
| <b>Sex</b>                |             |              |             |              |                    |                     |                     |
| Male                      | 190 (59.0%) | 1528 (62.1%) | 673 (65.5%) | 309 (62.9%)  | 819 (63.4%)        | <b>1647 (62.7%)</b> | -                   |
| Female                    | 132 (41.0%) | 933 (37.9%)  | 355 (34.5%) | 182 (37.1%)  | 472 (36.6%)        | <b>980 (37.3%)</b>  | -                   |
| <b>Adverse events</b>     |             |              |             |              |                    |                     |                     |
|                           | 40 (12.4%)  | 197 (8.0%)   | 124 (12.1%) | 27 (5.5%)    | 454 (35.2%)        | -                   | -                   |
| <b>Codon 139</b>          |             |              |             |              |                    |                     |                     |
| Arg/Arg                   | 242 (75.2%) | 1900 (77.2%) | 791 (76.9%) | 372 (75.8%)  | 958 (74.2%)        | <b>2026 (77.1%)</b> | <b>1651 (81.1%)</b> |
| Arg/Cys                   | 65 (20.2%)  | 496 (20.2%)  | 201 (19.6%) | 102 (20.8%)  | 275 (21.3%)        | <b>534 (20.3%)</b>  | <b>362 (17.8%)</b>  |
| Cys/Cys                   | 15 (4.7%)   | 56 (2.3%)    | 32 (3.1%)   | 16 (3.3%)    | 49 (3.8%)          | <b>56 (2.1%)</b>    | <b>22 (1.1%)</b>    |
| Arg/His                   | 0 (0.0%)    | 6 (0.24%)    | 4 (0.39%)   | 1 (0.20%)    | 7 (0.54%)          | <b>8 (0.30%)</b>    | <b>1 (0.05%)</b>    |
| Cys/His                   | 0 (0.0%)    | 3 (0.12%)    | 0 (0.0%)    | 0 (0.0%)     | 2 (0.15%)          | <b>3 (0.11%)</b>    | <b>0 (0.0%)</b>     |

**Supplementary Table 3.** Case–control association studies between the genotypes of p.Arg139Cys and AEs associated with IBD drugs

| IBD drugs          | Genotype frequencies* (% to each AE group) |             |            |              |             |           | p-values**           | Allelic association*** |                  |
|--------------------|--------------------------------------------|-------------|------------|--------------|-------------|-----------|----------------------|------------------------|------------------|
|                    | AE(+)                                      |             |            | AE(-)        |             |           |                      | (Arg vs. Cys)          |                  |
|                    | Arg/Arg                                    | Arg/Cys     | Cys/Cys    | Arg/Arg      | Arg/Cys     | Cys/Cys   |                      | p-values               | OR (95%CI)       |
| <b>SASP</b>        | 27 (67.5%)                                 | 11 (27.5%)  | 2 (5.0%)   | 215 (76.2%)  | 54 (19.1%)  | 13 (4.6%) | 0.325                | 0.363                  | 1.40 (0.76–2.57) |
| <b>5-ASA</b>       | 163 (82.7%)                                | 31 (15.7%)  | 3 (1.5%)   | 1737 (76.7%) | 465 (20.5%) | 53 (2.3%) | 0.068                | 0.070                  | 0.71 (0.50–1.01) |
| <b>IFX</b>         | 95 (76.6%)                                 | 26 (21.0%)  | 3 (2.4%)   | 696 (77.0%)  | 175 (19.4%) | 29 (3.2%) | 0.986                | 1.000                  | 1.00 (0.67–1.48) |
| <b>ADA</b>         | 23 (85.2%)                                 | 4 (14.8%)   | 0 (0.0%)   | 349 (75.2%)  | 98 (21.1%)  | 16 (3.4%) | 0.192                | 0.240                  | 0.49 (0.17–1.38) |
| <b>thiopurines</b> | 260 (57.3%)                                | 141 (31.1%) | 49 (10.8%) | 698 (83.4%)  | 134 (16.0%) | 0 (0.0%)  | 1.29E <sup>-32</sup> | 1.55E <sup>-36</sup>   | 4.13 (3.28–5.20) |

AE: adverse event, OR: odds ratio, CI: confidence interval

\* Rare genotypes (CH and RH) were excluded

\*\* Cochran–Armitage trend analysis

\*\*\* Chi-squared test

**Supplementary Table 4.** Patient characteristics from thiopurine study and breakdown of adverse events

| <b>Disease</b>                                      | <b>UC</b>   | <b>CD</b>   | <b>BD</b> | <b>p-values*</b> | <b>Total</b>       |
|-----------------------------------------------------|-------------|-------------|-----------|------------------|--------------------|
| <b>Number of subjects</b>                           | 722         | 548         | 21        | -                | <b>1291</b>        |
| <b>Gender (M/F)</b>                                 | 425 / 297   | 382 / 166   | 12 / 9    | -                | <b>819 / 472</b>   |
| <b>Adverse Events of Thiopurines</b>                | 256 (35.5%) | 193 (35.2%) | 5 (23.8%) | 0.60             | <b>454 (35.2%)</b> |
| <b>Leukopenia (WBC &lt; 3000/<math>\mu</math>L)</b> | 129 (17.9%) | 104 (19.0%) | 3 (14.3%) | 0.83             | <b>236 (18.3%)</b> |
| <b>Alopecia</b>                                     | 54 (7.5%)   | 32 (5.8%)   | 1 (4.8%)  | 0.48             | <b>87 (6.7%)</b>   |
| <b>Liver Dysfunction</b>                            | 33 (4.6%)   | 13 (2.4%)   | 1 (4.8%)  | 0.09             | <b>47 (3.6%)</b>   |
| <b>Pancreatitis</b>                                 | 13 (1.8%)   | 7 (1.3%)    | 0 (0.0%)  | 0.64             | <b>20 (1.5%)</b>   |
| <b>Digestive symptoms</b>                           | 56 (7.8%)   | 37 (6.8%)   | 0 (0.0%)  | 0.46             | <b>93 (7.2%)</b>   |
| <b>Infection</b>                                    | 10 (1.4%)   | 7 (1.3%)    | 0 (0.0%)  | 1.00             | <b>17 (1.3%)</b>   |
| <b>Fever</b>                                        | 6 (0.8%)    | 7 (1.3%)    | 0 (0.0%)  | 0.66             | <b>13 (1.0%)</b>   |
| <b>Skin symptoms</b>                                | 3 (0.4%)    | 4 (0.7%)    | 0 (0.0%)  | 0.53             | <b>7 (0.5%)</b>    |
| <b>Malignant tumor</b>                              | 1 (0.1%)    | 1 (0.2%)    | 0 (0.0%)  | 1.00             | <b>2 (0.2%)</b>    |

UC: ulcerative colitis, CD: Crohn's disease, BD: intestinal Behçet's disease

\*Fisher's exact tests

**Supplementary Table 5.** Top hit regions from the results of GWASs for thiopurine-induced AEs

| Adverse Events                      | CHR                  | From*<br>(Mbp)        | To*<br>(Mbp)          | SNPs<br>**      | Genes***                             | Top SNP                           |               |               |                             |                                       |
|-------------------------------------|----------------------|-----------------------|-----------------------|-----------------|--------------------------------------|-----------------------------------|---------------|---------------|-----------------------------|---------------------------------------|
|                                     |                      |                       |                       |                 |                                      | dbSNP                             | Ref           | Alt           | P-value                     | OR (95%CI)_                           |
| Leukopenia<br>(WBC < 3000/ $\mu$ L) | Chr3<br><b>Chr13</b> | 62.87<br><b>48.24</b> | 62.87<br><b>48.73</b> | 1<br><b>365</b> | CADPS<br><b>NUDT15, SUCLA2, MED4</b> | rs117829974<br><b>rs116855232</b> | C<br><b>C</b> | T<br><b>T</b> | 1.62E-07<br><b>1.32E-33</b> | 2.1 (1.6–2.7)<br><b>5.8 (4.4–7.7)</b> |
| Alopecia                            | Chr5                 | 125.68                | 125.68                | 1               | GRAMD3                               | rs75466870                        | A             | T             | 5.07E-07                    | 4.5 (2.5–8.0)                         |
|                                     | Chr6                 | 47.08                 | 47.08                 | 1               | GPR110, TNFRSF21, GPR116             | rs117927258                       | T             | C             | 1.86E-07                    | 6.5 (3.2–13.2)                        |
|                                     | Chr10                | 96.42                 | 96.42                 | 1               | HELLS, CYP2C18, CYP2C19, TBC1D12     | rs145080284                       | C             | G             | 9.73E-07                    | 3.8 (2.2–6.5)                         |
|                                     | Chr11                | 42.15                 | 42.15                 | 1               |                                      | rs78844412                        | T             | A             | 5.97E-07                    | 6.9 (3.2–14.8)                        |
|                                     | <b>Chr13</b>         | <b>48.42</b>          | <b>48.73</b>          | <b>336</b>      | <b>NUDT15, SUCLA2, MED4</b>          | <b>rs116855232</b>                | <b>C</b>      | <b>T</b>      | <b>4.26E-29</b>             | <b>10.4 (6.9–15.6)</b>                |
| Fever                               | no candidate         |                       |                       | -               | -                                    | -                                 | -             | -             | -                           |                                       |
| Liver Dysfunction                   | no candidate         |                       |                       | -               | -                                    | -                                 | -             | -             | -                           |                                       |
| Digestive Symptoms                  | Chr1                 | 90.31                 | 90.31                 | 1               | LRRC8D, LRRC8C, ZNF326               | rs12035735                        | G             | A             | 6.59E-07                    | 5.0 (2.7–9.6)                         |
| Infection                           | no candidate         |                       |                       |                 |                                      |                                   |               |               |                             |                                       |
| Liver Dysfunction                   | no candidate         |                       |                       |                 |                                      |                                   |               |               |                             |                                       |
| Pancreatitis                        | Chr3                 | 2.06                  | 2.08                  | 6               | CNTN4                                | rs4437130                         | G             | A             | 1.77E-07                    | 6.8 (3.3–14.1)                        |
|                                     | Chr9                 | 98.32                 | 98.32                 | 3               | PTCH1                                | rs62561366                        | A             | T             | 5.24E-07                    | 7.0 (3.3–14.8)                        |
| Skin Symptoms                       | no candidate         |                       |                       | -               | -                                    | -                                 | -             | -             | -                           |                                       |

\*Positions are based on the Genome Reference Consortium human build 37 (GRCh37)

\*\*Number of SNPs with P-values <  $1 \times 10^{-6}$

\*\*\*Genes located within the region  $\pm 200$  kbp



**Supplementary Table 6.** Conditional GWASs of leukopenia and severe alopecia on NUDT15 Arg139Cys

| Adverse Events          | CHR  | From*<br>(Mbp) | To*<br>(Mbp) | SNPs<br>** | Genes***              | Top SNP     |     |     |          |                  |
|-------------------------|------|----------------|--------------|------------|-----------------------|-------------|-----|-----|----------|------------------|
|                         |      |                |              |            |                       | dbSNP       | Ref | Alt | P-value  | OR (95%CI)_      |
| Leukopenia              | Chr1 | 212.84         | 212.84       | 1          | FAM71A,BATF3,ATF3,(3) | rs2501846   | T   | C   | 9.91E-07 | 1.94 (1.49–2.52) |
| Severe Leukopenia       |      | no candidate   |              |            |                       | -           | -   | -   | -        | -                |
| Acute Severe Leukopenia | Chr2 | 196.01         | 196.14       | 6          | -                     | rs117506642 | C   | A   | 4.76E-07 | 13.3 (4.9–36.3)  |
| Alopecia                |      | no candidate   |              |            |                       | -           | -   | -   | -        | -                |
| Severe Alopecia         |      | no candidate   |              |            |                       | -           | -   | -   | -        | -                |

\*Positions are based on the Genome Reference Consortium human build 37 (GRCh37)

\*\*Number of SNPs with P-values  $< 1 \times 10^{-6}$

\*\*\*Genes located within the region  $\pm 200$  kbp

**Supplementary Table 7.** Association of thiopurine-induced leukopenia (WBC < 3000/ $\mu$ L) with previously reported variants

| Chr | Position* | dbSNP       | Gene / Location          | A1 | A2 | A1 Frequencies   |              | p-values**      | OR (95%CI)       | p-values** on rs116855232 |
|-----|-----------|-------------|--------------------------|----|----|------------------|--------------|-----------------|------------------|---------------------------|
|     |           |             |                          |    |    | Control (n=1024) | Case (n=196) |                 |                  |                           |
| 6   | 18130918  | rs1142345   | TPMT A719G (Tyr240Cys)   | G  | A  | 2.5%             | 1.0%         | 2.12E-01        | 0.40 (0.09–1.69) | 4.22E-01                  |
| 13  | 48619855  | rs116855232 | NUDT15 C415T (Arg139Cys) | T  | C  | 17.9%            | 75.0%        | <b>1.32E-33</b> | 5.80 (4.36–7.71) | NA                        |
| 13  | 95815415  | rs3765534   | ABCC4 G2269A (Glu757Lys) | A  | G  | 31.3%            | 22.4%        | <b>2.30E-02</b> | 0.67 (0.48–0.95) | 7.09E-02                  |
| 16  | 53860052  | rs79206939  | FTO G400A (Ala134Thr)    | A  | G  | 4.4%             | 3.6%         | 6.20E-01        | 0.82 (0.37–1.82) | 7.48E-01                  |
| 20  | 3193842   | rs1127354   | ITPase C94A(Pro32Thr)    | A  | C  | 27.6%            | 27.6%        | 9.92E-01        | 1.00 (0.73–1.38) | 7.58E-01                  |
| 21  | 36564651  | rs2834826   | RUNX1 upstream           | T  | C  | 72.3%            | 82.7%        | 5.35E-02        | 1.24 (1.00–1.55) | <b>1.66E-02</b>           |

\*Positions are based on the Genome Reference Consortium human build 37 (GRCh37)

\*\*Logistic regression model with sex as a covariate

**Supplementary Table 8.** Evaluation of different prediction models of leukopenia and severe alopecia using NUDT15 variants.

| Model              | Cut-off     |             | Leukopenia<br>(WBC < 3000/ $\mu$ L) |             |               | Severe Leukopenia<br>(WBC < 2000/ $\mu$ L) |             |               | Acute Severe Leukopenia<br>(WBC < 2000/ $\mu$ L. < 8 weeks) |             |               | Severe Alopecia |             |               |
|--------------------|-------------|-------------|-------------------------------------|-------------|---------------|--------------------------------------------|-------------|---------------|-------------------------------------------------------------|-------------|---------------|-----------------|-------------|---------------|
|                    | Negative    | Positive    | Sensitivity                         | Specificity | AUC           | Sensitivity                                | Specificity | AUC           | Sensitivity                                                 | Specificity | AUC           | Sensitivity     | Specificity | AUC           |
| <b>Codon139_A</b>  | RR          | RC,CC,RH,CH | 0.566                               | 0.809       | 0.687         | 0.806                                      | 0.782       | 0.794         | 0.923                                                       | 0.772       | 0.848         | 1.000           | 0.771       | 0.885         |
| <b>Codon139_B</b>  | RR,RH       | RC,CC,CH    | 0.560                               | 0.816       | 0.688         | 0.806                                      | 0.790       | <b>0.798*</b> | 0.923                                                       | 0.780       | <b>0.852*</b> | 1.000           | 0.778       | 0.889         |
| <b>Codon139_C</b>  | RR,RH,RC    | CC,CH       | 0.200                               | 0.997       | 0.599         | 0.448                                      | 0.992       | 0.720         | 0.667                                                       | 0.991       | 0.829         | 0.919           | 0.997       | 0.958         |
| <b>Codon139_D</b>  | RR,RH,RC,CH | CC          | 0.189                               | 0.997       | 0.593         | 0.418                                      | 0.992       | 0.705         | 0.641                                                       | 0.992       | 0.817         | 0.919           | 0.999       | <b>0.959*</b> |
| <b>Diplotype_A</b> | NN          | NI,NL,IL,LL | 0.594                               | 0.787       | <b>0.691*</b> | 0.821                                      | 0.759       | 0.790         | 0.923                                                       | 0.749       | 0.836         | 1.000           | 0.747       | 0.874         |
| <b>Diplotype_B</b> | NN,NI       | NL,IL,LL    | 0.566                               | 0.816       | <b>0.691*</b> | 0.806                                      | 0.788       | 0.797         | 0.923                                                       | 0.779       | 0.851         | 1.000           | 0.777       | 0.889         |
| <b>Diplotype_C</b> | NN,NI,NL    | IL,LL       | 0.206                               | 0.995       | 0.600         | 0.448                                      | 0.989       | 0.718         | 0.667                                                       | 0.988       | 0.827         | 0.919           | 0.994       | 0.956         |
| <b>Diplotype_D</b> | NN,NI,NL,IL | LL          | (Same as Codon139_D Model)          |             |               |                                            |             |               |                                                             |             |               |                 |             |               |

AUC: Area under Receiver Operating Characteristic (ROC) curve, NN: Normal and Normal (1\*1), NI: Normal and Intermediate (\*1\*4,\*1\*5,\*1\*6), NL: Normal and Low (\*1\*2,\*1\*3\*,1\*9), IL: Intermediate and Low (\*2\*4,\*2\*5,\*3\*4,\*3\*5), LL: Low and Low (\*2\*2,\*2\*3,\*3\*3)

\*Best AUC in each adverse event.

**Supplementary Table 9.** Number of subjects in GWASs

| <b>Adverse Events</b>   | <b>Case</b> | <b>Control</b> |
|-------------------------|-------------|----------------|
| Leukopenia              | 196         | 1024           |
| Severe Leukopenia       | 72          | 1148           |
| Acute Severe Leukopenia | 43          | 1172           |
| Alopecia (all)          | 81          | 1139           |
| Severe Alopecia         | 41          | 1179           |
| Pancreatitis            | 18          | 1202           |
| Fever                   | 10          | 1210           |
| Digestive Symptoms      | 93          | 1127           |
| Infection               | 14          | 1206           |
| Liver dysfunction       | 39          | 1181           |
| Skin symptoms           | 6           | 1214           |

**Supplementary Table 10.** Provisional recommendations of safe initial doses of thiopurines in terms of the genotype of NUDT15 codon 139

| Genotype of Codon 139 | Risk of severe adverse events<br>if the patients keep taking normal dose of thiopurines |                 | Estimated Safe Initial Dose         |
|-----------------------|-----------------------------------------------------------------------------------------|-----------------|-------------------------------------|
|                       | Acute Severe Leukopenia                                                                 | Severe alopecia |                                     |
| <b>Arg/Arg</b>        | Rare (<0.1%)                                                                            | Rare (<0.1%)    | AZA 50 mg/day or 6-MP 30 mg/day     |
| <b>Arg/His</b>        | Rare (<0.1%)                                                                            | Rare (<0.1%)    | AZA 50 mg/day or 6-MP 30 mg/day     |
| <b>Arg/Cys</b>        | Low risk (<5%)                                                                          | Low risk (<5%)  | AZA 25 mg/day or 6-MP 10–15 mg/day  |
| <b>Cys/His</b>        | High risk (>50%)                                                                        | Rare (<0.1%)    | 6-MP 5–10 mg/day                    |
| <b>Cys/Cys</b>        | Inevitable                                                                              | Inevitable      | Contraindication (6-MP 1–2 mg/day?) |

| NUDT15 haplotypes |                                     |       | Enzyme activity<br>in vitro | Reference    | Haplotype frequencies |                     |              |
|-------------------|-------------------------------------|-------|-----------------------------|--------------|-----------------------|---------------------|--------------|
| Exon1             | Exon2                               | Exon3 |                             |              | 2KJPN<br>(n = 2036)   | MENDEL<br>(n = 970) |              |
| *1                |                                     |       |                             | Normal       | Moriyama et al [1]    | 3625 (89.0%)        | 1627 (83.9%) |
| *2                | <br>p.Val18_Val19insGlyVal          |       | <br>p.Arg139Cys             | Low          | Moriyama et al [1]    | 126 (3.1%)          | 101 (5.2%)   |
| *3                |                                     |       | <br>p.Arg139Cys             | Low          | Moriyama et al [1]    | 280 (6.9%)          | 178 (9.2%)   |
| *4                |                                     |       | <br>p.Arg139His             | Intermediate | Moriyama et al [1]    | 1 (0.025%)          | 9 (0.46%)    |
| *5                | <br>p.Val18Ile                      |       |                             | Intermediate | Moriyama et al [1]    | 33 (0.81%)          | 20 (1.0%)    |
| *6                | <br>p.Val18_Val19insGlyVal          |       |                             | Intermediate | Moriyama et al [1]    | 4 (0.10%)           | 4 (0.21%)    |
| *7                | <br>p.Arg34Thr                      |       |                             | Low          | Moriyama et al [2]    | 0 (0.0%)            | 0 (0.0%)     |
| *8                | <br>p.Lys35Glu                      |       |                             | Intermediate | Moriyama et al [2]    | 0 (0.0%)            | 0 (0.0%)     |
| *9                | <br>p.Gly17_Val18del                |       |                             | Low          | Moriyama et al [2]    | 1 (0.025%)          | 1 (0.052%)   |
| *10               | <br>p.Met1Thr (Loss of start codon) |       |                             | -            | Nagasaki et al [3]    | 1 (0.025%)          | 0 (0.0%)     |
| *11               | <br>p.Gly47Arg                      |       |                             | -            | Nagasaki et al [3]    | 1 (0.025%)          | 0 (0.0%)     |

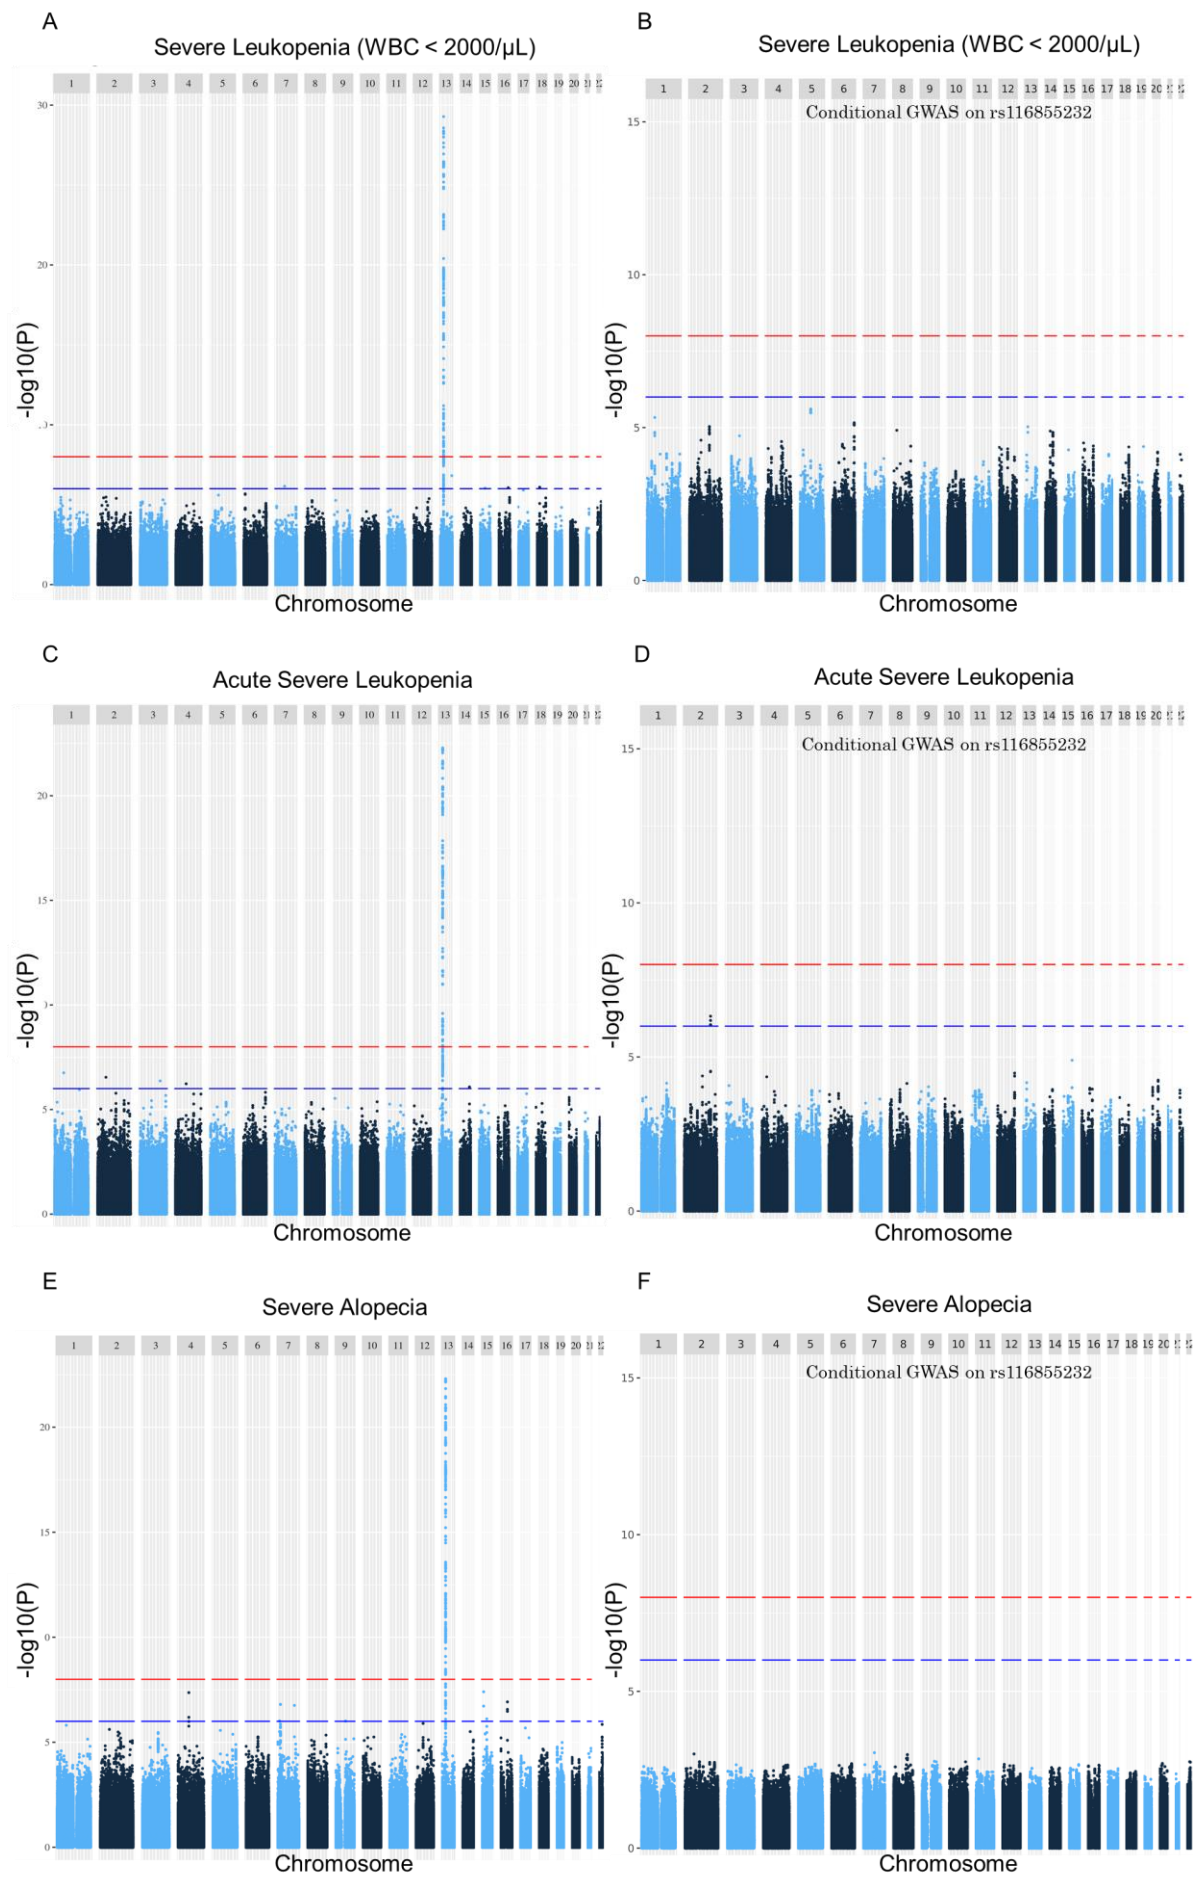

Supplementary Figure S2

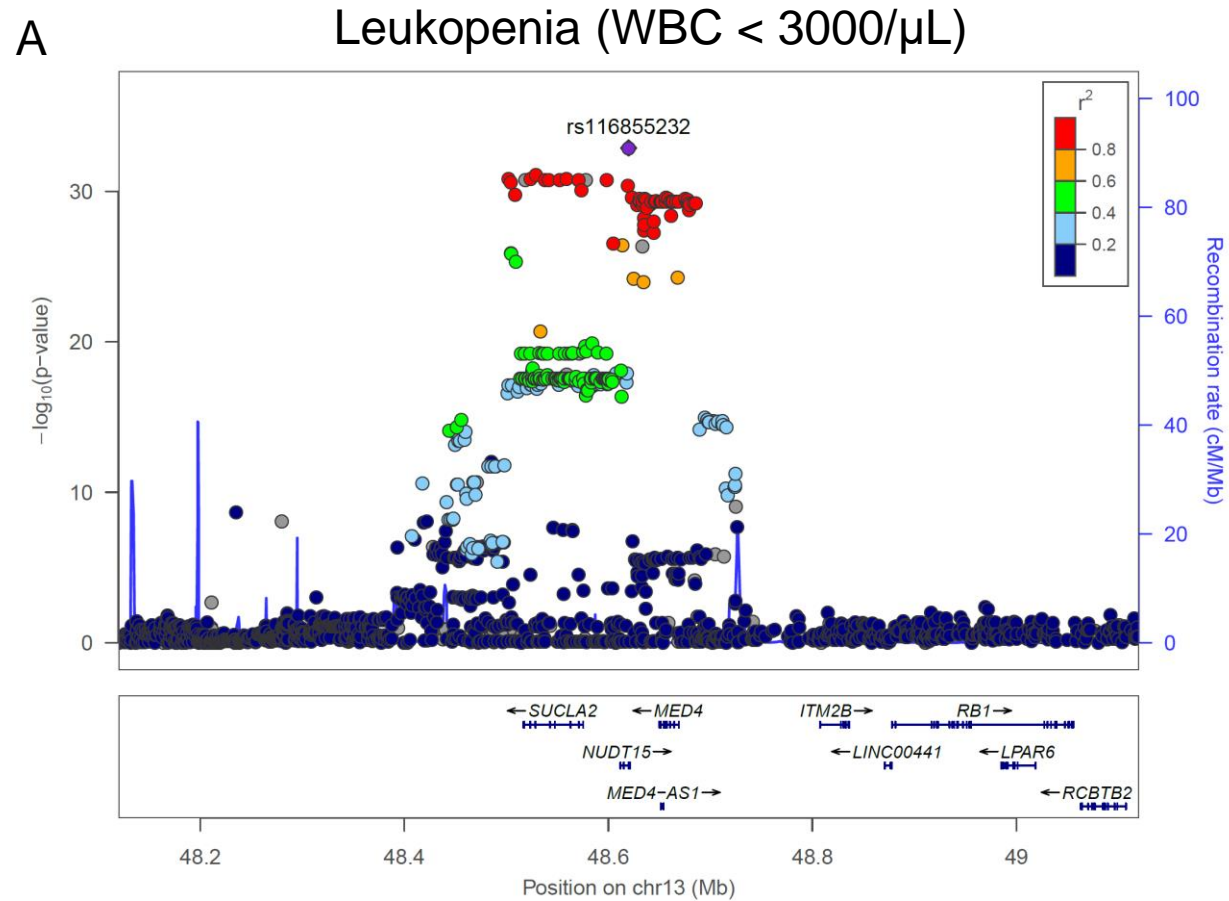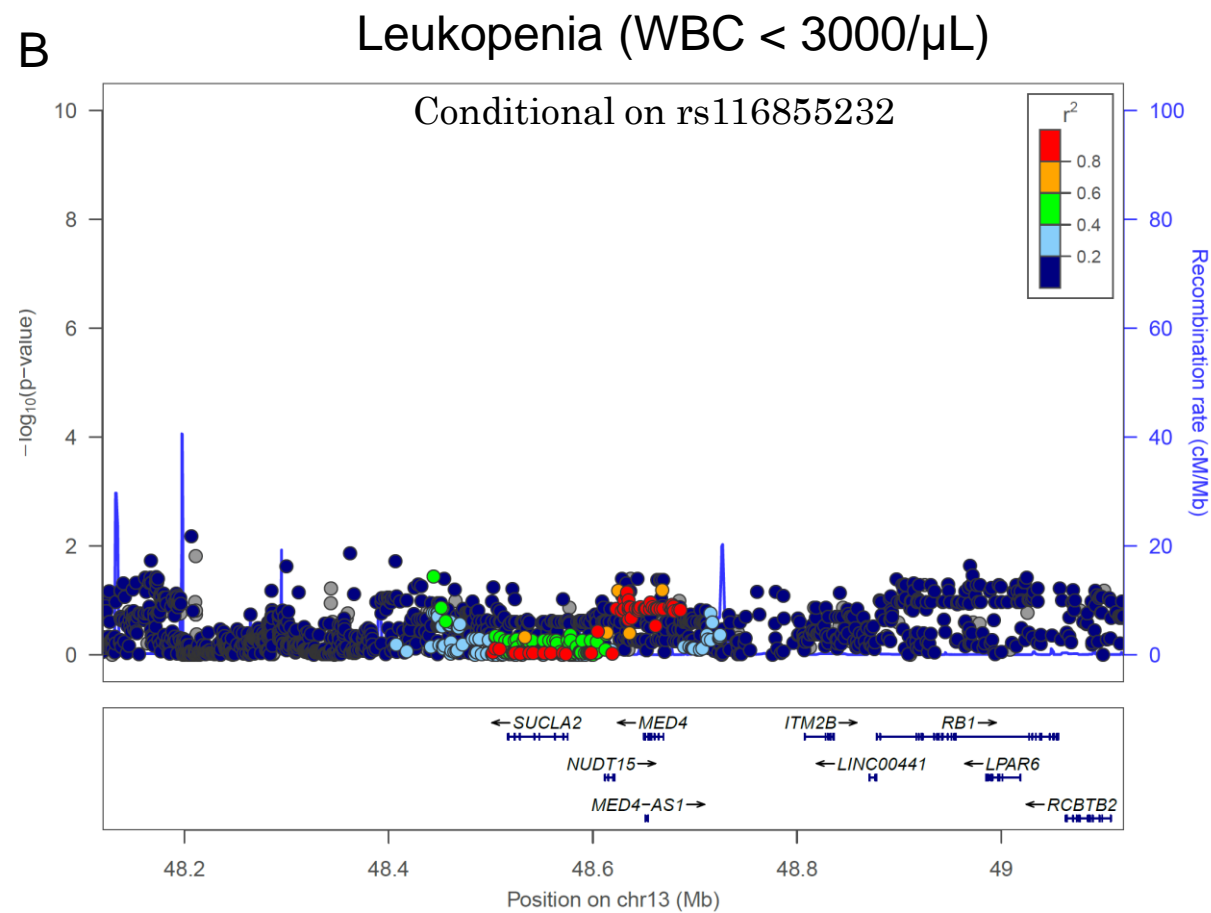



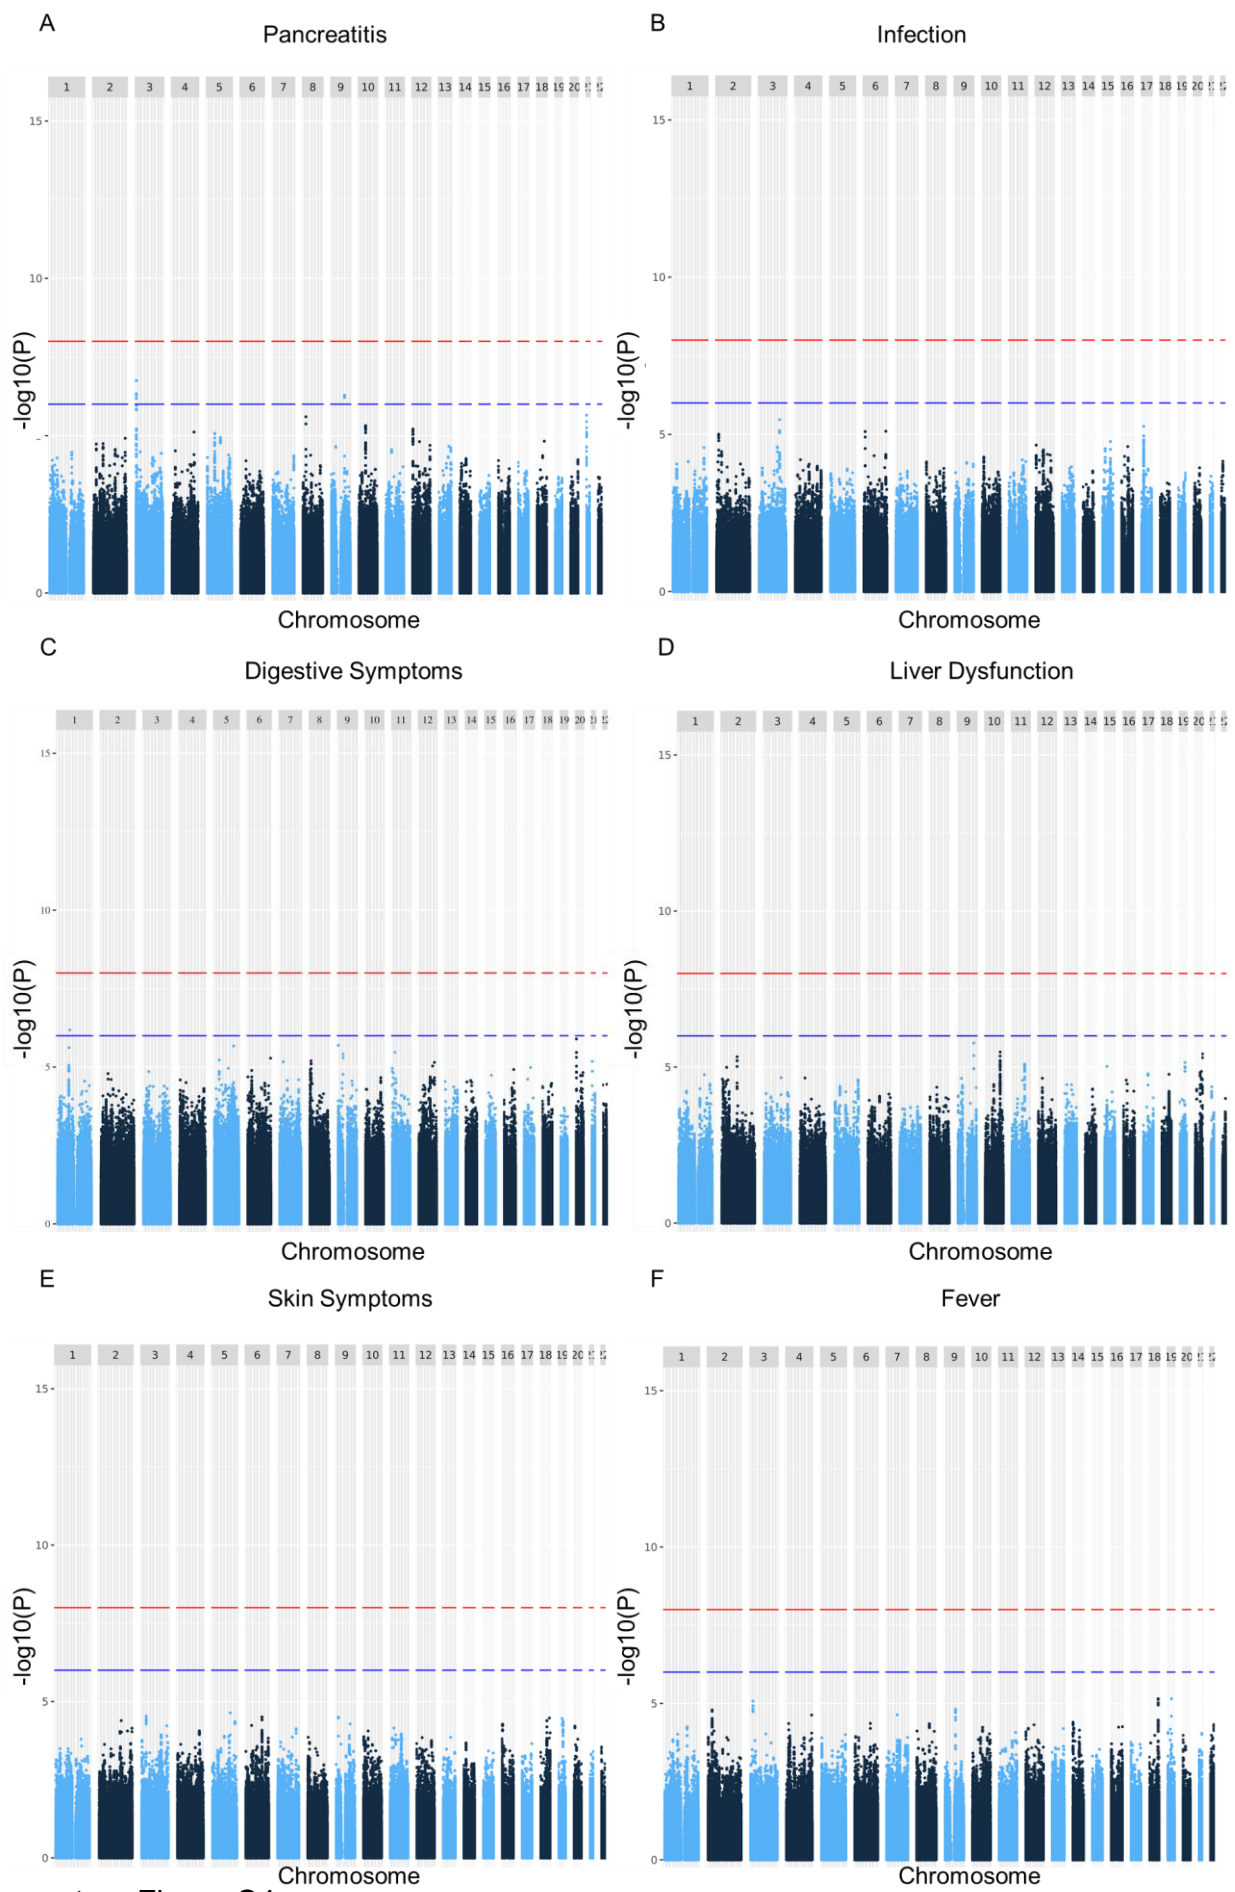

Supplementary Figure S4

### A Pancreatitis

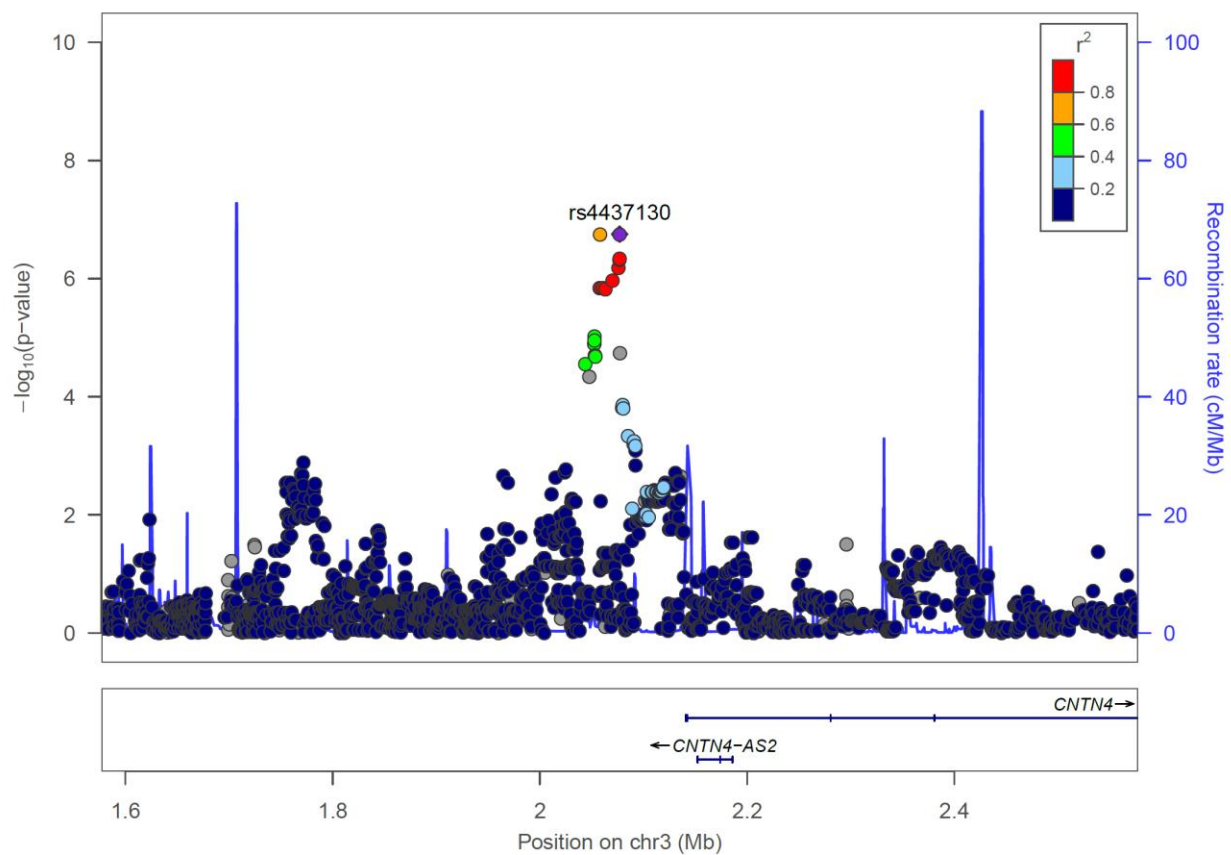

### B Pancreatitis

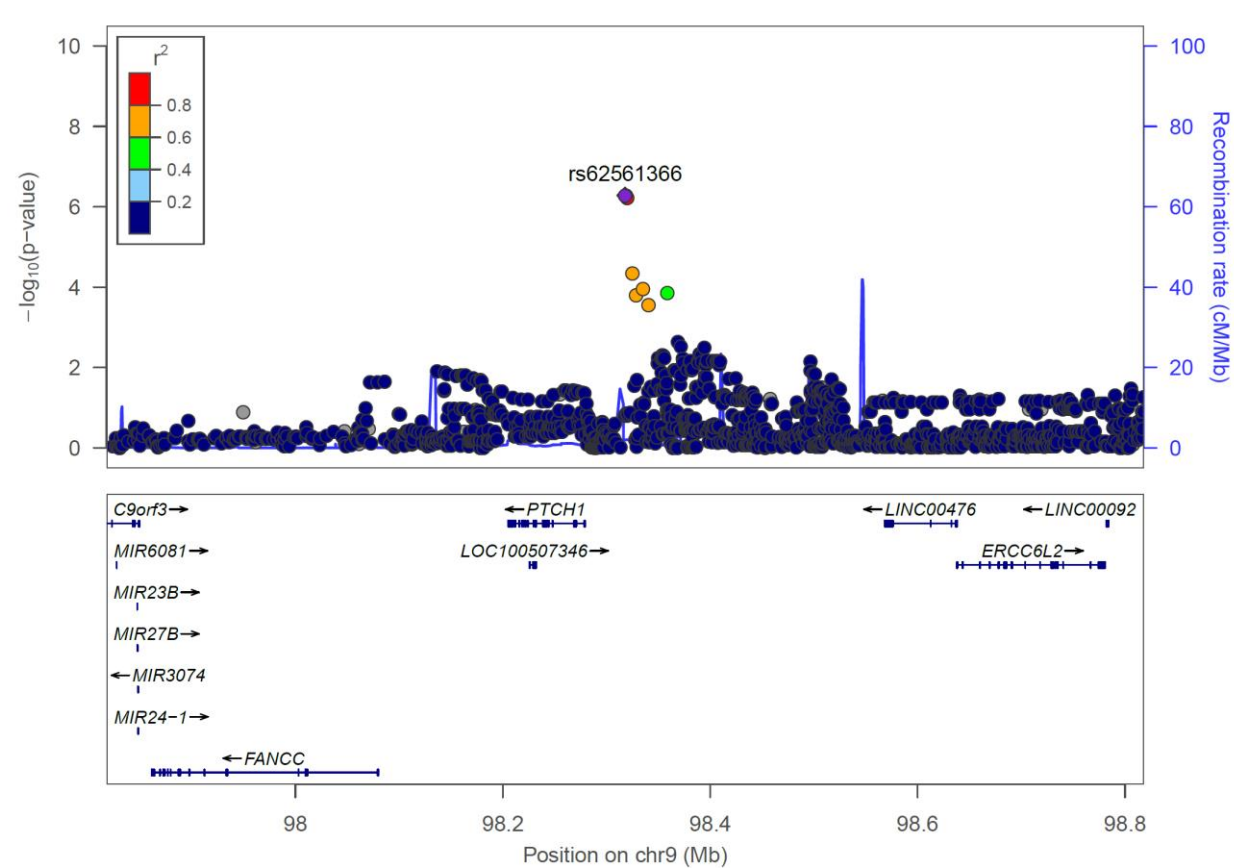

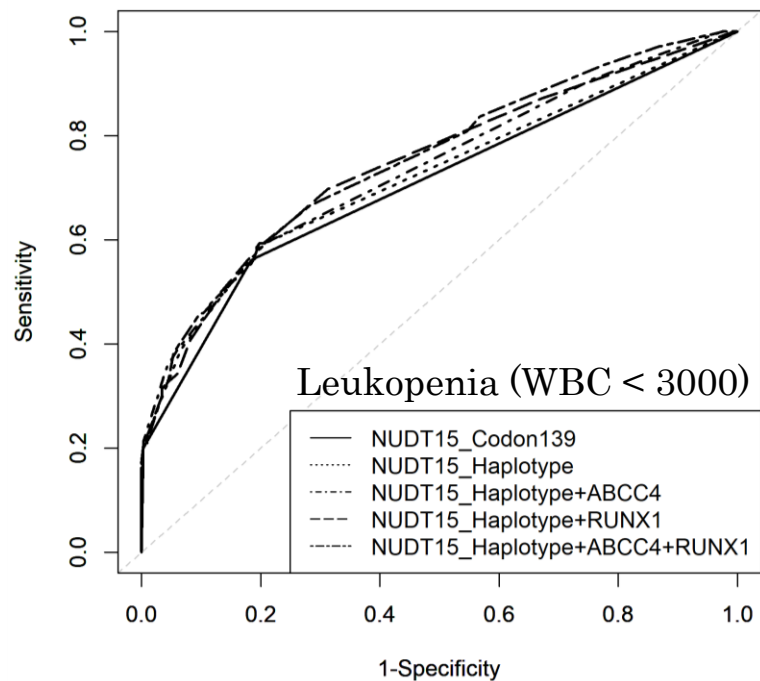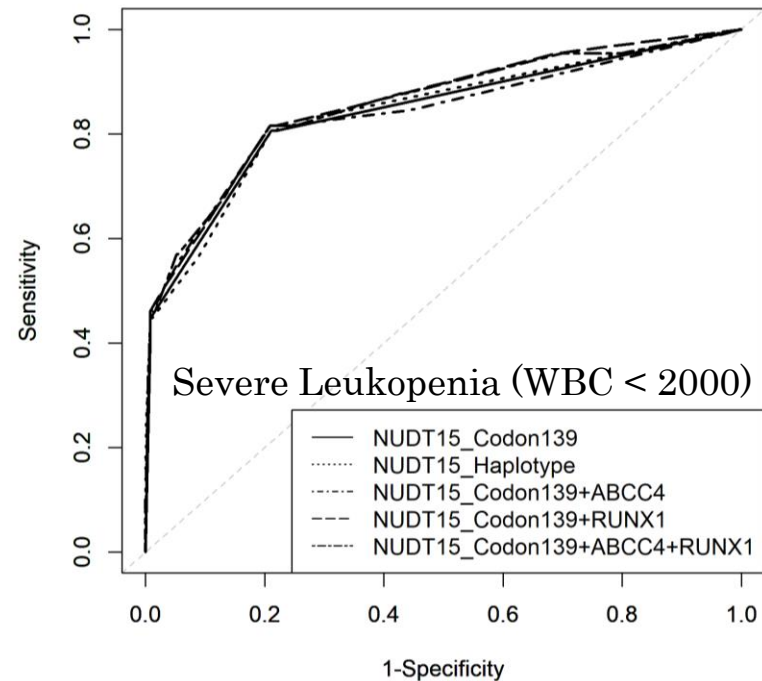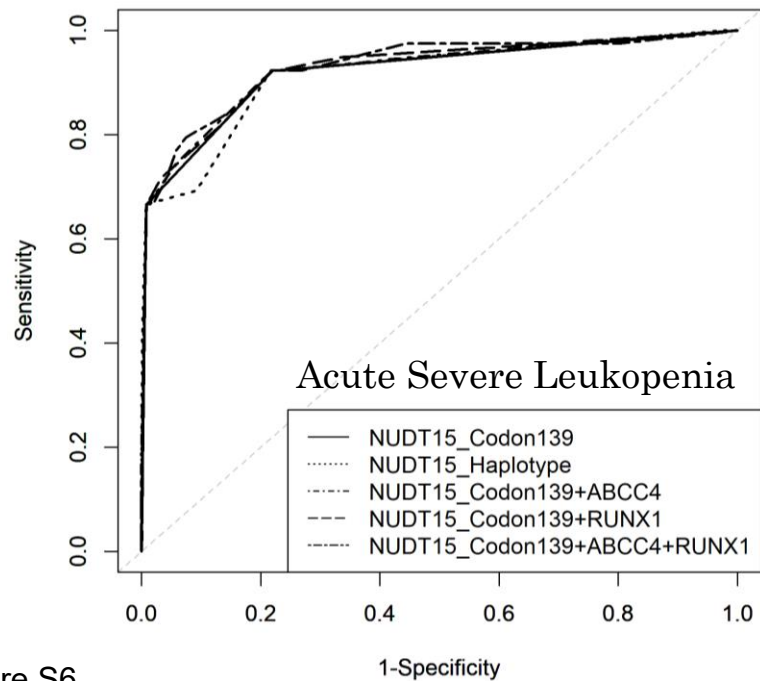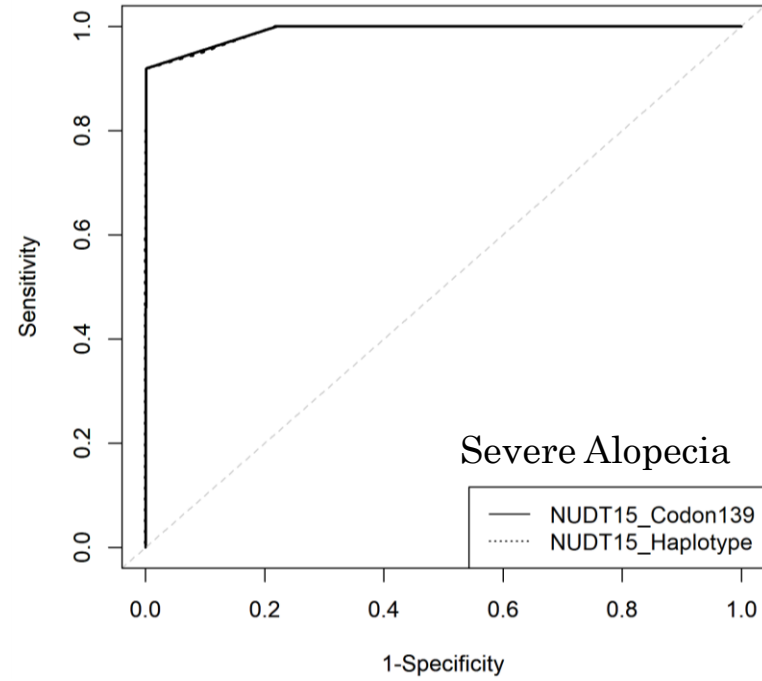

### Genotype Cys/Cys

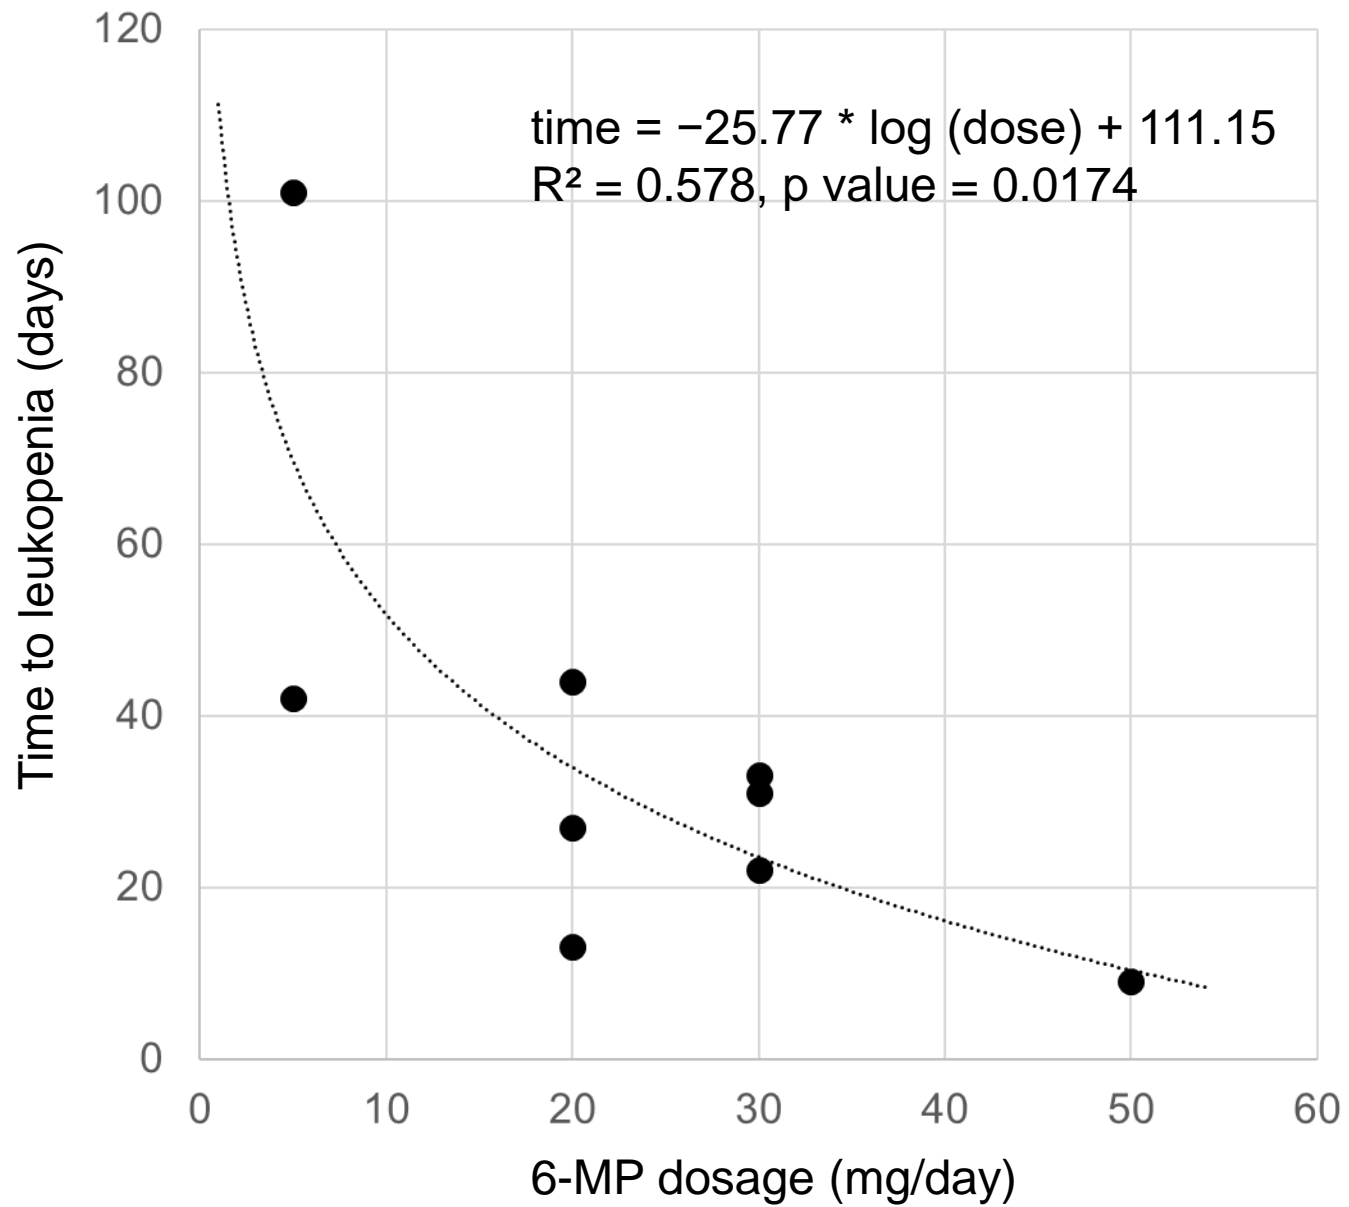

Supplement: 535_2018_1486_MOESM1_ESM.pdf [file 535_2018_1486_MOESM1_ESM.pdf]
